# Supplementary material
Source: HighWire-hosted journal article supplement (https://bmjopenquality.bmj.com/content/11/4/e001959)
Supplement: inline-supplementary-material-6 [file inline-supplementary-material-6.pdf]

## Video anaesthetic clinic – doctors survey

### Q1 Level of anaesthetic experience

Answered: 10 Skipped: 1

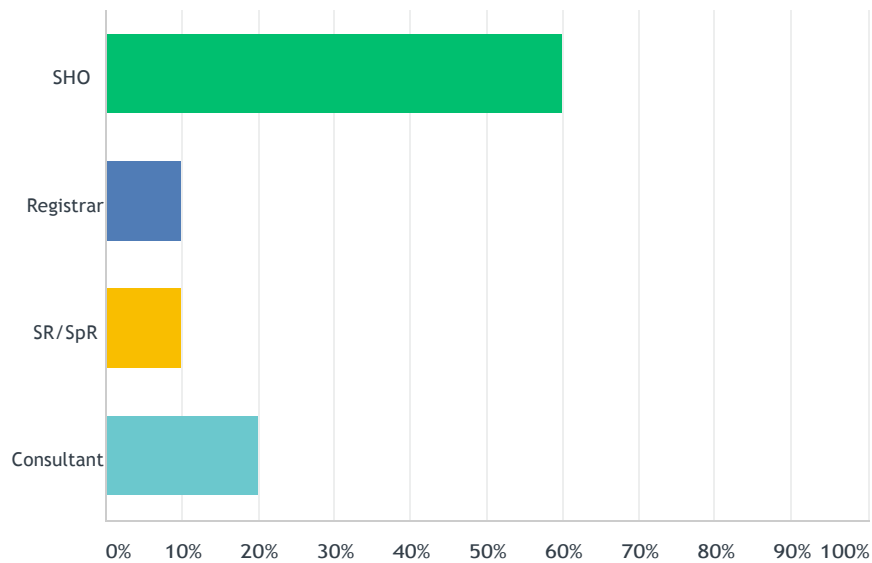

| ANSWER CHOICES | RESPONSES |
|----------------|-----------|
| SHO            | 60.00% 6  |
| Registrar      | 10.00% 1  |
| SR/SpR         | 10.00% 1  |
| Consultant     | 20.00% 2  |
| TOTAL          | 10        |

## Q2 Estimated number of video consultations you have completed

Answered: 11 Skipped: 0

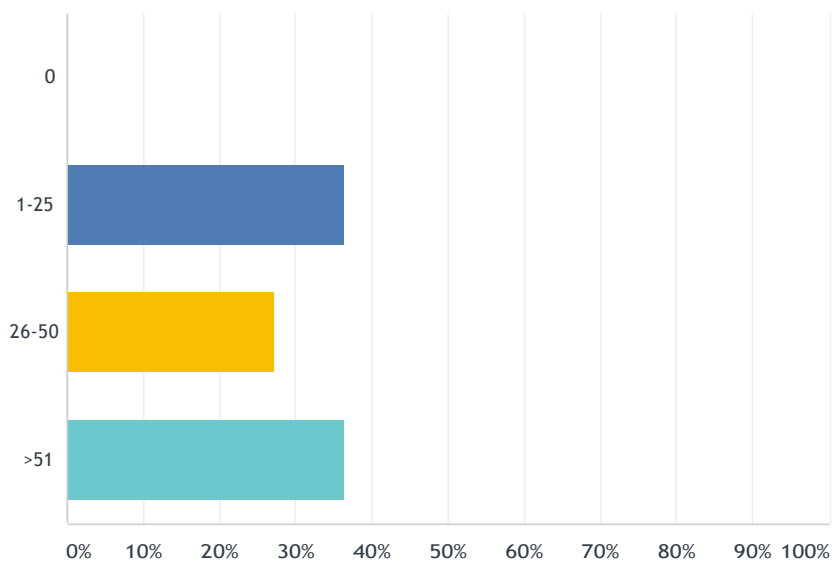

| ANSWER CHOICES | RESPONSES |    |
|----------------|-----------|----|
| 0              | 0.00%     | 0  |
| 1-25           | 36.36%    | 4  |
| 26-50          | 27.27%    | 3  |
| >51            | 36.36%    | 4  |
| TOTAL          |           | 11 |

### Q3 Overall in the last two months, operating the video platform was easy and convenient for me

Answered: 11 Skipped: 0

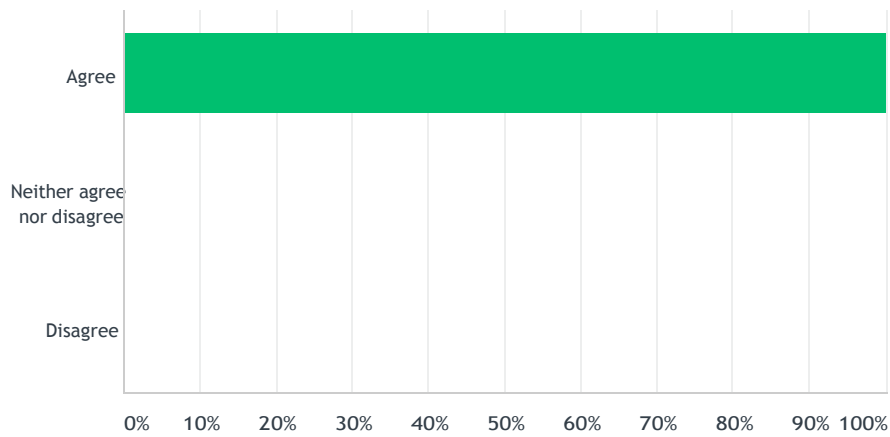

| ANSWER CHOICES             | RESPONSES |           |
|----------------------------|-----------|-----------|
| Agree                      | 100.00%   | 11        |
| Neither agree nor disagree | 0.00%     | 0         |
| Disagree                   | 0.00%     | 0         |
| <b>TOTAL</b>               |           | <b>11</b> |

## Q4 Overall in the last two months, I could hear and understand everything that was being said by the patients

Answered: 11 Skipped: 0

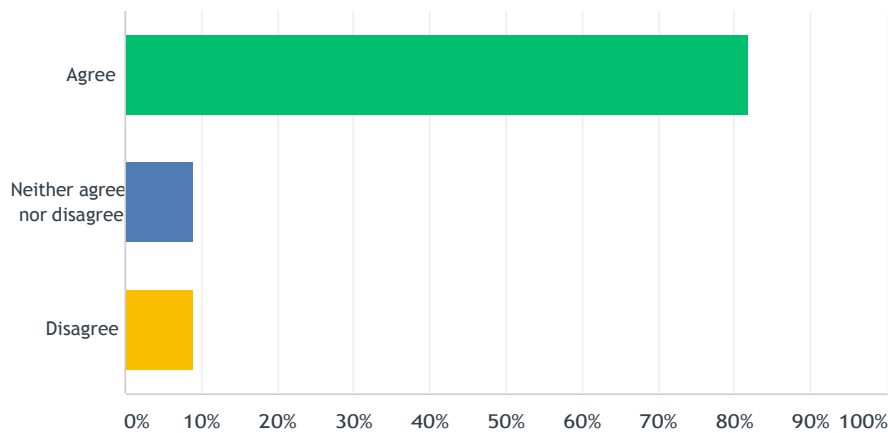

| ANSWER CHOICES             | RESPONSES |    |
|----------------------------|-----------|----|
| Agree                      | 81.82%    | 9  |
| Neither agree nor disagree | 9.09%     | 1  |
| Disagree                   | 9.09%     | 1  |
| TOTAL                      |           | 11 |

## Q5 Overall in the last two months, I could see patients clearly on the screen

Answered: 11 Skipped: 0

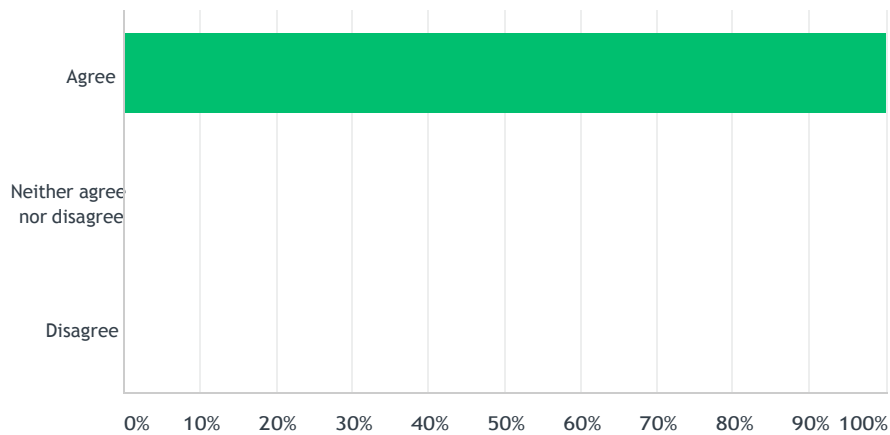

| ANSWER CHOICES             | RESPONSES |           |
|----------------------------|-----------|-----------|
| Agree                      | 100.00%   | 11        |
| Neither agree nor disagree | 0.00%     | 0         |
| Disagree                   | 0.00%     | 0         |
| <b>TOTAL</b>               |           | <b>11</b> |

## Q6 Overall in the last two months, I have experienced minimum interruptions due to poor hospital internet connection

Answered: 11 Skipped: 0



| ANSWER CHOICES             | RESPONSES |           |
|----------------------------|-----------|-----------|
| Agree                      | 100.00%   | 11        |
| Neither agree nor disagree | 0.00%     | 0         |
| Disagree                   | 0.00%     | 0         |
| <b>TOTAL</b>               |           | <b>11</b> |

## Q7 I am aware that there is a "Virtual anaesthetic consultation" guide in CWIUH

Answered: 11 Skipped: 0

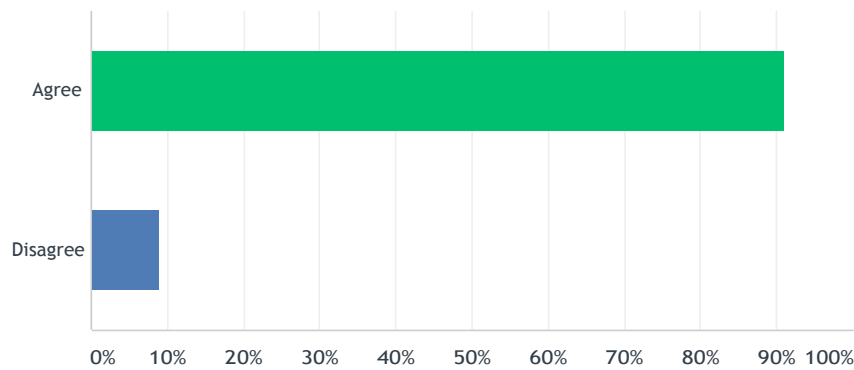

| ANSWER CHOICES | RESPONSES |
|----------------|-----------|
| Agree          | 90.91% 10 |
| Disagree       | 9.09% 1   |
| TOTAL          | 11        |

## Q8 I have read the guide

Answered: 11 Skipped: 0

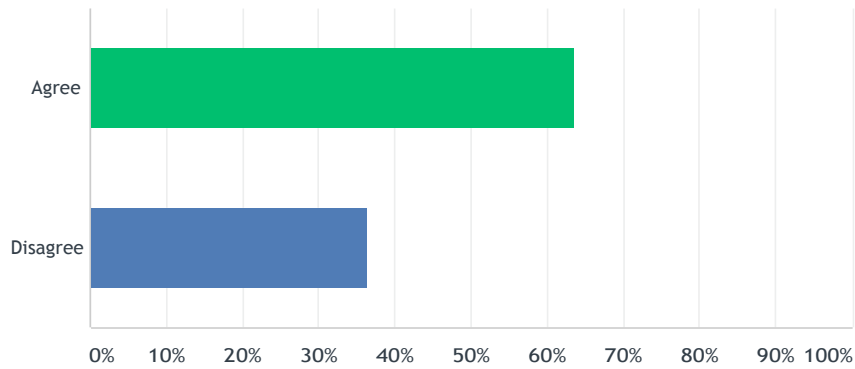

| ANSWER CHOICES | RESPONSES |    |
|----------------|-----------|----|
| Agree          | 63.64%    | 7  |
| Disagree       | 36.36%    | 4  |
| TOTAL          |           | 11 |



## Q9 I apply the guide in my consultations

Answered: 11 Skipped: 0

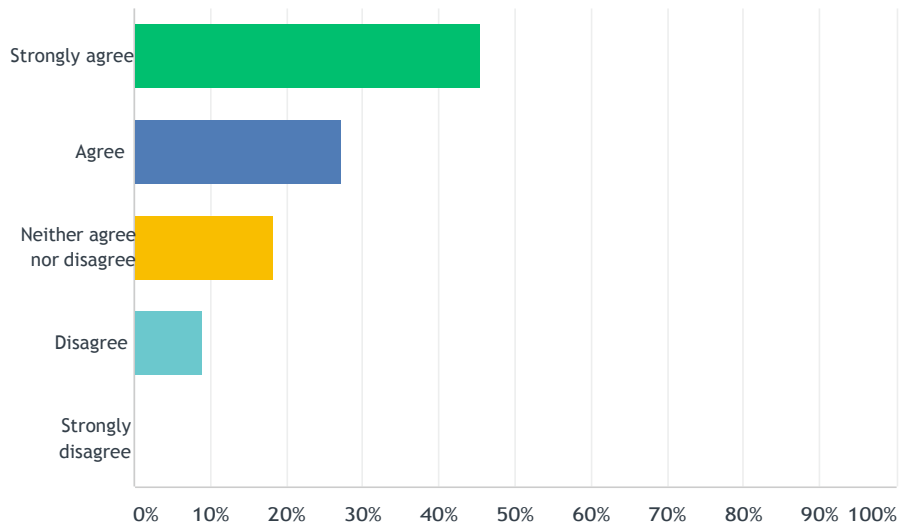

| ANSWER CHOICES             | RESPONSES |           |
|----------------------------|-----------|-----------|
| Strongly agree             | 45.45%    | 5         |
| Agree                      | 27.27%    | 3         |
| Neither agree nor disagree | 18.18%    | 2         |
| Disagree                   | 9.09%     | 1         |
| Strongly disagree          | 0.00%     | 0         |
| <b>TOTAL</b>               |           | <b>11</b> |

## Video Anaesthetic Clinic - Doctors Feedback Survey

## Q10 I find the guide easy to follow

Answered: 11 Skipped: 0

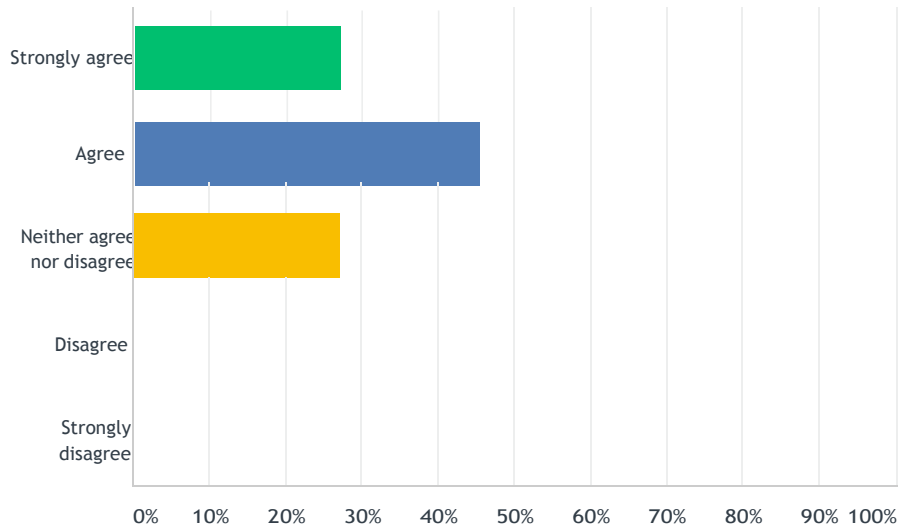

| ANSWER CHOICES             | RESPONSES |           |
|----------------------------|-----------|-----------|
| Strongly agree             | 27.27%    | 3         |
| Agree                      | 45.45%    | 5         |
| Neither agree nor disagree | 27.27%    | 3         |
| Disagree                   | 0.00%     | 0         |
| Strongly disagree          | 0.00%     | 0         |
| <b>TOTAL</b>               |           | <b>11</b> |

## Video Anaesthetic Clinic - Doctors Feedback Survey

## Q11 If "Disagree" or "Strongly disagree" to Q 9&amp;10 please explain

Answered: 3 Skipped: 8

## Q12 List three GDPR requirements for virtual consultation

Answered: 11 Skipped: 0

## Q13 I have clerical support when I need

Answered: 11 Skipped: 0

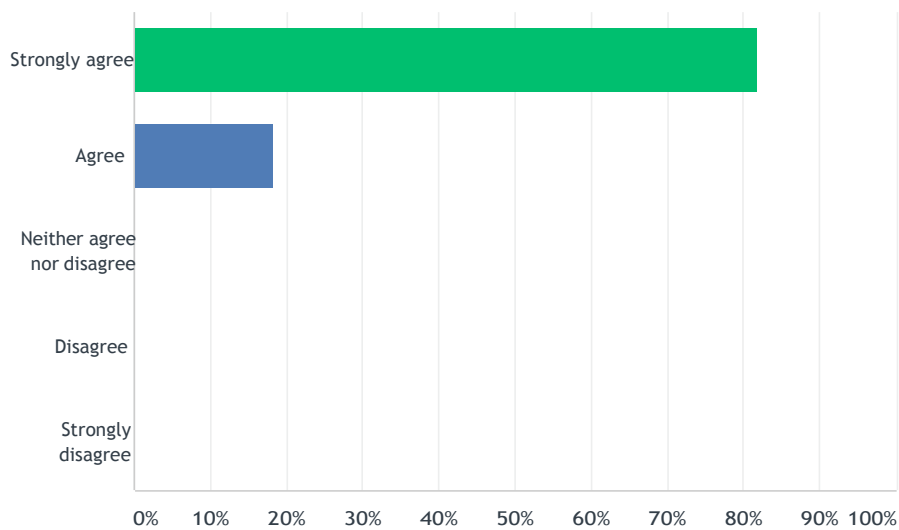

| ANSWER CHOICES             | RESPONSES |           |
|----------------------------|-----------|-----------|
| Strongly agree             | 81.82%    | 9         |
| Agree                      | 18.18%    | 2         |
| Neither agree nor disagree | 0.00%     | 0         |
| Disagree                   | 0.00%     | 0         |
| Strongly disagree          | 0.00%     | 0         |
| <b>TOTAL</b>               |           | <b>11</b> |

## Video Anaesthetic Clinic - Doctors Feedback Survey

## Q14 I know when and how to escalate a patient to a consultant

Answered: 11 Skipped: 0

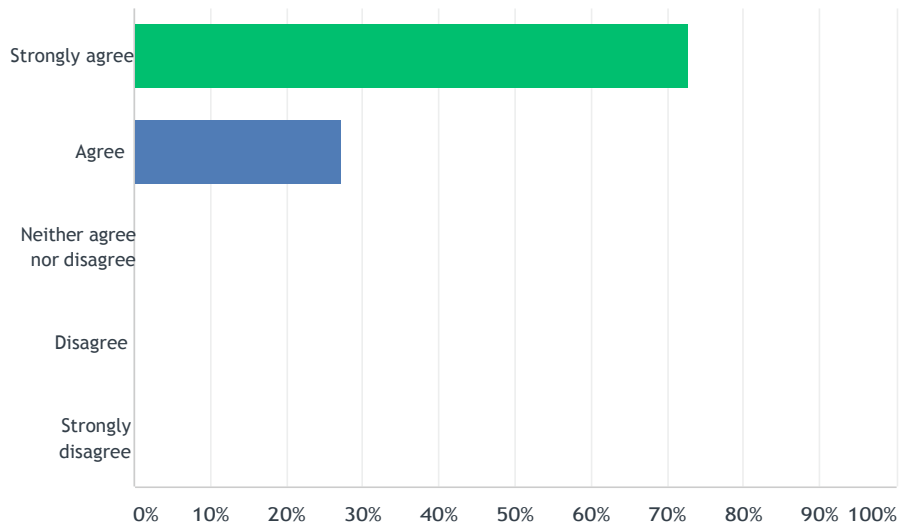

| ANSWER CHOICES             | RESPONSES |           |
|----------------------------|-----------|-----------|
| Strongly agree             | 72.73%    | 8         |
| Agree                      | 27.27%    | 3         |
| Neither agree nor disagree | 0.00%     | 0         |
| Disagree                   | 0.00%     | 0         |
| Strongly disagree          | 0.00%     | 0         |
| <b>TOTAL</b>               |           | <b>11</b> |

## Video Anaesthetic Clinic - Doctors Feedback Survey

## Q15 I feel supported when I escalate a patient to a consultant

Answered: 11 Skipped: 0

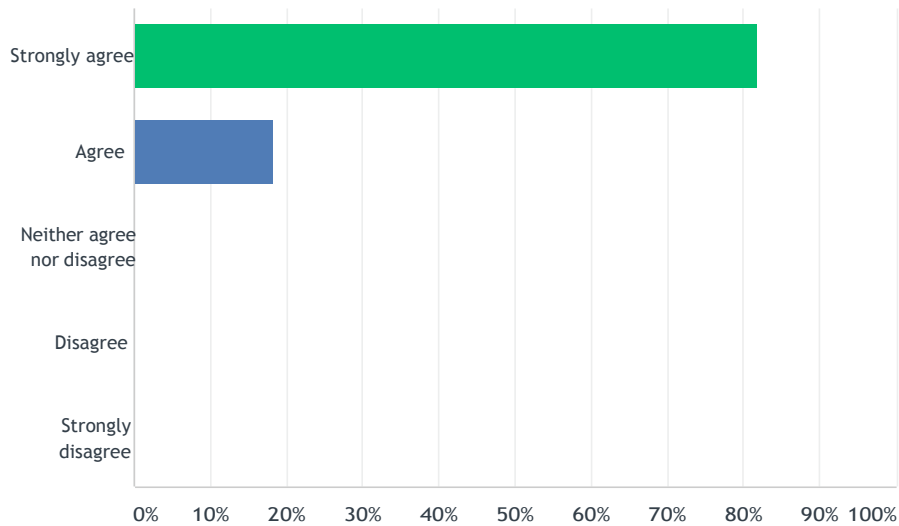

| ANSWER CHOICES             | RESPONSES |           |
|----------------------------|-----------|-----------|
| Strongly agree             | 81.82%    | 9         |
| Agree                      | 18.18%    | 2         |
| Neither agree nor disagree | 0.00%     | 0         |
| Disagree                   | 0.00%     | 0         |
| Strongly disagree          | 0.00%     | 0         |
| <b>TOTAL</b>               |           | <b>11</b> |

## Video Anaesthetic Clinic - Doctors Feedback Survey

## Q16 The camera does not affect my ability to perform consultation

Answered: 11 Skipped: 0

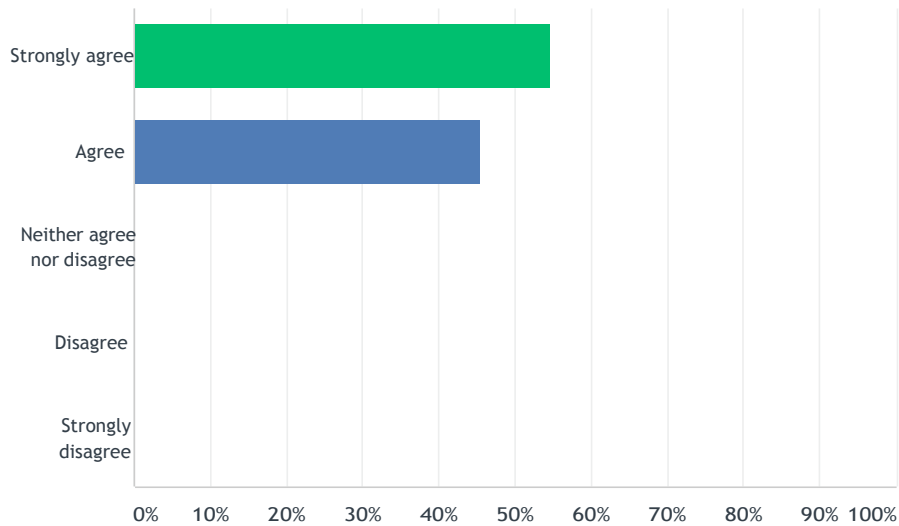

| ANSWER CHOICES             | RESPONSES |           |
|----------------------------|-----------|-----------|
| Strongly agree             | 54.55%    | 6         |
| Agree                      | 45.45%    | 5         |
| Neither agree nor disagree | 0.00%     | 0         |
| Disagree                   | 0.00%     | 0         |
| Strongly disagree          | 0.00%     | 0         |
| <b>TOTAL</b>               |           | <b>11</b> |

## Video Anaesthetic Clinic - Doctors Feedback Survey

### Q17 In my opinion, the video anaesthetic assessment does not prevent me from formulating a safe anaesthetic plan for my patients when compared to in-person

Answered: 11 Skipped: 0

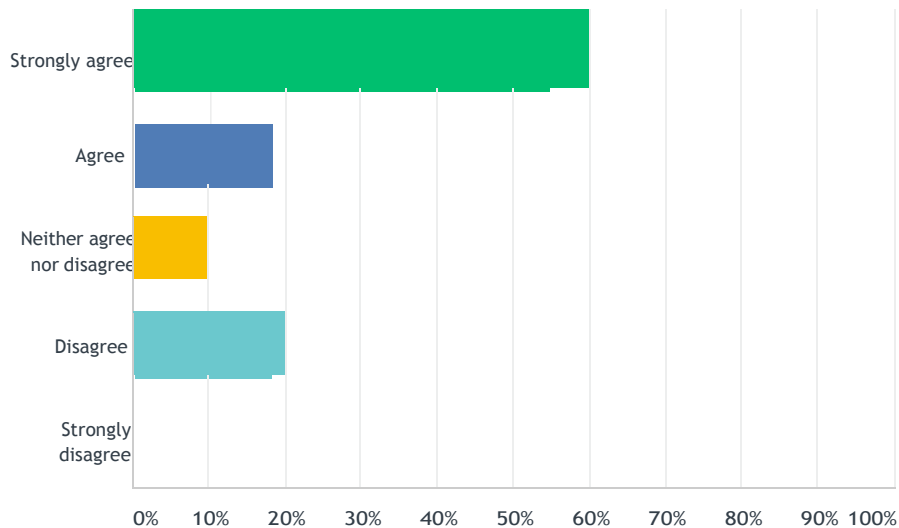

| ANSWER CHOICES             | RESPONSES |           |
|----------------------------|-----------|-----------|
| Strongly agree             | 54.55%    | 6         |
| Agree                      | 18.18%    | 2         |
| Neither agree nor disagree | 9.09%     | 1         |
| Disagree                   | 18.18%    | 2         |
| Strongly disagree          | 0.00%     | 0         |
| <b>TOTAL</b>               |           | <b>11</b> |

## Video Anaesthetic Clinic - Doctors Feedback Survey

**Q18 In my opinion, the virtual anaesthetic consultation could potentially transform the preoperative assessment (airway assessment, better resource utilisation, patient involvement etc.) in future.**

Answered: 11 Skipped: 0

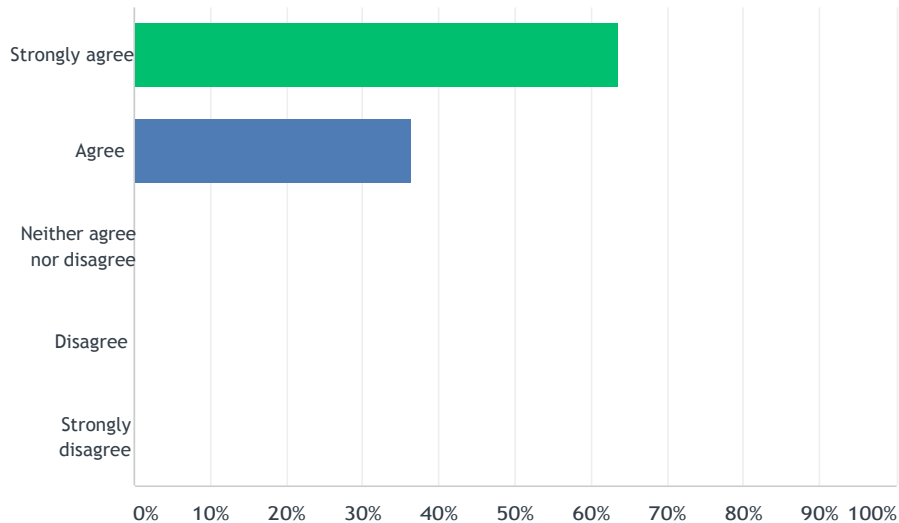

| ANSWER CHOICES             | RESPONSES |           |
|----------------------------|-----------|-----------|
| Strongly agree             | 63.64%    | 7         |
| Agree                      | 36.36%    | 4         |
| Neither agree nor disagree | 0.00%     | 0         |
| Disagree                   | 0.00%     | 0         |
| Strongly disagree          | 0.00%     | 0         |
| <b>TOTAL</b>               |           | <b>11</b> |
